# Supplementary material for: TmpL, a Transmembrane Protein Required for Intracellular Redox Homeostasis and Virulence in a Plant and an Animal Fungal Pathogen
Source: PubMed Central journal article supplement (PMC2766074; doi:10.1371/journal.ppat.1000653), 2009-11-06
Supplement: ppat.1000653.s002.pdf [file ppat.1000653.s002.pdf]

|             |     |                                                                                 |                                                          |                              |
|-------------|-----|---------------------------------------------------------------------------------|----------------------------------------------------------|------------------------------|
| <b>TmpL</b> | 501 | NGKVDKAQLKILAAERNNPVVHVKRLLETMHTRSES                                            | AFDPLALFTKAMVPRELMRALADVD                                | 560                          |
| <b>TmpA</b> | 1   | -----MSQP                                                                       | EEVIVTRPPTAV                                             | CVP-----ESPSETS              |
|             |     | :* : : . *                                                                      | ..* * . : **:* :                                         | *.. : : ...*                 |
| <b>TmpL</b> | 561 | LEKAYPLKSLEDYSLVEKDAPLNI                                                        | PARLPEPDVSEVTAWLRHRGLIAYR                                | <u>WFLFPIVFANA</u>           |
| <b>TmpA</b> | 51  | LEAQSTARRLISP-----                                                              | IRYTF                                                    | LNIYRRL <u>FTLVFLANI</u>     |
|             |     | ** . : * .                                                                      | :* : * ** :                                              | : : **                       |
| <b>TmpL</b> | 621 | <u>GVACWLLYRYMQGSKYPLSPTATATASNLCAAILIRSEPVINLLF</u>                            | <u>LCSSVPTSTPLWIR</u>                                    | 680                          |
| <b>TmpA</b> | 85  | <u>GVFVYVMVADR-----</u>                                                         | KLLALVNAAAANLLACGLARQPLVVNTIFFTVCSIPRSAPLWLR             | 139                          |
|             |     | ** : : :                                                                        | * . ..*:*:** * . * * . * : * : * : . . * : * : * : * : * |                              |
| <b>TmpL</b> | 681 | RIFAKVFHIGGIHVGCAIAAVMWFVI                                                      | FTVGASLEMARNDDERERSV                                     | <u>LPAALS</u>                |
| <b>TmpA</b> | 140 | RIASKVYHYGGVHSGCGVASLIWYLG                                                      | FIFGFSRQYWSGSSS - P                                      | <u>FSAAPIV</u>               |
|             |     | ** : ** : * ** : * : * : * : * : *                                              | * : . . . . *                                            | * . * . * : * : * : *        |
| <b>TmpL</b> | 741 | <u>AMTSLSHPVFRNRHDLWEALHRFGGWTVLILYWVLVGLSTKDLA</u>                             | <u>HGRTLSTSEAYLQTP</u>                                   | 800                          |
| <b>TmpA</b> | 199 | <u>AIIVAYPTFRFRKRHDYFELTHRFSGWLIVALFVILLMVFVDEA</u>                             | <u>SAAEGKPMGRFLIELP</u>                                  | 258                          |
|             |     | * : : : * . ** : : ** : *                                                       | ** . ** : : * : * : : . . : : . . : : *                  |                              |
| <b>TmpL</b> | 801 | <u>SLWLITAATCAIIFPWLF</u>                                                       | <u>FLRRVPVRPEVLSHAVRLHFDSEVTP</u>                        | -GKGVRLAQHPLRDWH             |
| <b>TmpA</b> | 259 | <u>AFWFLMLVVLAIHPWLL</u>                                                        | <u>LRKVKVTPEYLSHAVRLHFSHTTTT</u>                         | <u>FGKGIQLSKHPLQDWH</u>      |
|             |     | : * : : . . * * . * * : * * * * .                                               | * . * * * * . * . * * * * : * : * * * * : * * * * *      |                              |
| <b>TmpL</b> | 860 | GFATITNAP-GGKGHSVIVSRAGDFTGNMIDTAPTHIWRRGIPTSGVLRIATLFKSVVVV                    | 918                                                      |                              |
| <b>TmpA</b> | 319 | GFATFPDVRDVGKSFSSLVSKAGDWTAAATIKDQPTHLWKRGLIYGFAYAMRVYKRVVVV                    | 378                                                      |                              |
|             |     | * * * * : . . . . * * . . * : * * : * * : * . * . * : * * * * : * . : * * * * * |                                                          |                              |
| <b>TmpL</b> | 919 | ATGSGIGPCLSI                                                                    | FPYR-HVAMRVLWTAPNHETTFGKAI                               | VDARRKDPRAVLYNTRTSGKP        |
| <b>TmpA</b> | 379 | TTGSGIGPCL                                                                      | SFLGDENRPSLRVIWQTRAPKR                                   | TYGKEVLNLVGRMDPNPVIIDTNSSGRL |
|             |     | : * * * * * * * * : . : : * * : * : * * * : : * * * * . * : * . * * :           |                                                          |                              |
| <b>TmpL</b> | 978 | DMSLLAYRVYKESDAEAVLVISNKRFTQQIVFDMEKRGIPAYGAIFDS                                | 1025                                                     |                              |
| <b>TmpA</b> | 439 | DMVPVIRQIAREHDAEAI                                                              | CVISNPFVTKKVVELESMGIPAYGPIFDS                            | 486                          |
|             |     | ** : : : * * * * : * * * . * : : * : : * . * * * * . * * * *                    |                                                          |                              |
