# Supplementary material for: TmpL, a Transmembrane Protein Required for Intracellular Redox Homeostasis and Virulence in a Plant and an Animal Fungal Pathogen
Source: PubMed Central journal article supplement (PMC2766074; doi:10.1371/journal.ppat.1000653), 2009-11-06

**A**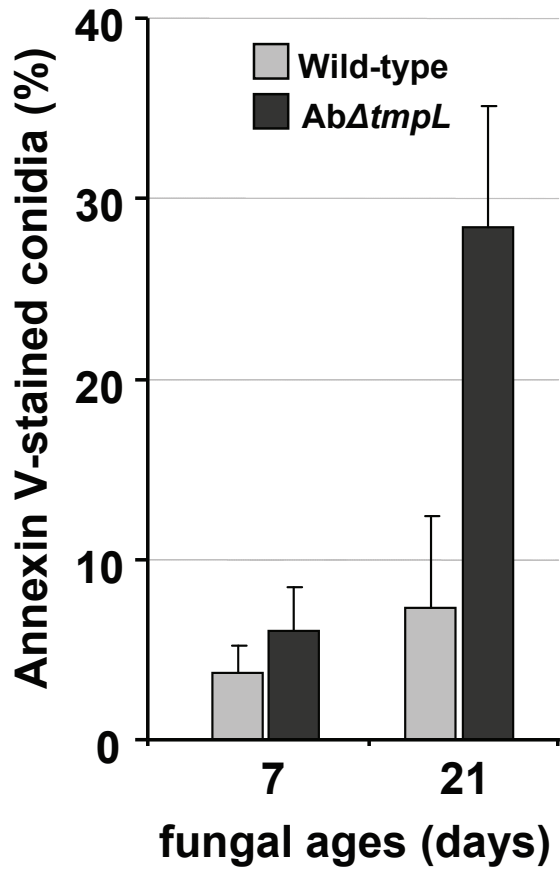**B**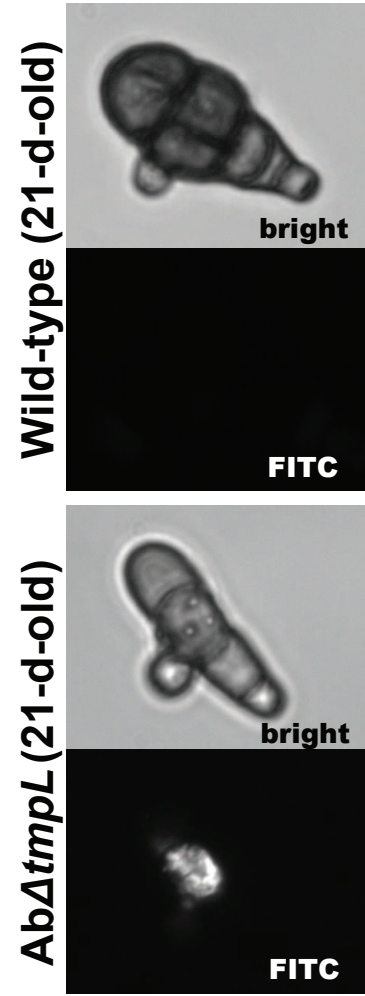

Supplement: ppat.1000653.s006.pdf [file ppat.1000653.s006.pdf]
