# Supplementary material for: TmpL, a Transmembrane Protein Required for Intracellular Redox Homeostasis and Virulence in a Plant and an Animal Fungal Pathogen
Source: PubMed Central journal article supplement (PMC2766074; doi:10.1371/journal.ppat.1000653), 2009-11-06
Supplement: ppat.1000653.s008.pdf [file ppat.1000653.s008.pdf]

**Table S1. Primer sequences used in this study**

| <b>OLIGO</b>                           | <b>SEQUENCE 5' TO 3'</b>                                   |
|----------------------------------------|------------------------------------------------------------|
| <i>Alternaria brassicicola</i> Primers |                                                            |
| <b>ATM1R1</b>                          | TCAGCAGAGCATGAAGTTCG                                       |
| <b>ATM1R2</b>                          | ATCAGTTAACGTCGACCTCGAATTGCGAGGGTAATTGACG                   |
| <b>ATM1R3</b>                          | CGTCAATTACCCTCGCAATTCGAGGTCGACGTTAACTGAT                   |
| <b>ATM1R4</b>                          | TCGTTTGGCACATTACCTCACGTCGACGTTAACTGGTTCC                   |
| <b>ATM1R5</b>                          | GGAACCAGTTAACGTCGACGTGAGGTAATGTGCCAAACGA                   |
| <b>ATM1R6</b>                          | CACAGGCACAATTCACAAGG                                       |
| <b>ATM1comF</b>                        | TCTAGGCTAGCAGGCAGCTC                                       |
| <b>ATM1comR</b>                        | CGAACTTCATGCTCTGCTGA                                       |
| <b>PNRcomF</b>                         | GAGCGGAGACATGTGAGACC                                       |
| <b>PNRcomR</b>                         | TCATTCTAGCTTGCGGTCCT                                       |
| <b>ATM1GFP1</b>                        | TTTCACATTGGCGGCATACA                                       |
| <b>ATM1GFP2-GA</b>                     | ACCATGGCACC GGCTCCAGCGCCTGCACCAGCTCCTGAATCGAAAATAGCGCCATAG |
| <b>ATM1GFP3-6GA</b>                    | ATTCAGGAGCTGGTGCAGGCGCTGGAGCCGGTGCCATGGTGAGCAAGGGCGAGGA    |
| <b>ATM1GFP4</b>                        | GTTCCCGGTCGGCATCTACT                                       |
| <b>A1AdeGFP1</b>                       | CTGGTAGGCTTGCAGAGAGTC                                      |
| <b>A1AdeGFP2-GA</b>                    | ACCATGGCACC GGCTCCAGCGCCTGCACCAGCTCCAGCTGTACCTCTGAAACATCC  |
| <b>A1AdeGFP3-GA</b>                    | CAGCTGGAGCTGGTGCAGGCGCTGGAGCCGGTGCCATGGTGAGCAAGGGCGAGGA    |
| <b>A1AdeGFP4</b>                       | GTTCCCGGTCGGCATCTACT                                       |
| <b>A1TmGFP1</b>                        | CTCAACATACCGGCCAGACT                                       |
| <b>A1TmGFP2</b>                        | ACCATGGCACC GGCTCCAGCGCCTGCACCAGCTCCGGCGTGCGAGGATAAGAC     |
| <b>A1TmGFP3</b>                        | ACGCCGAGCTGGTGCAGGCGCTGGAGCCGGTGCCATGGTGAGCAAGGGCGAGGA     |
| <b>A1TmGFP4</b>                        | GTTCCCGGTCGGCATCTACT                                       |
| <b>ToxAFor</b>                         | GCGTAGAGTTTGAGCGATCC                                       |
| <b>ToxA-DsRedRev</b>                   | GTTCTCGGAGGAGGCCATATCACGCTTGAAC TTTTGG                     |
| <b>DsRed-ToxAFor</b>                   | CCAAAAAGTTCAAGCGTGATATGGCCTCCTCCGAGAAC                     |

|                                |                                                         |
|--------------------------------|---------------------------------------------------------|
| <b>DsRed-AbHex1Rev</b>         | CTCGTTGTCGTAATATCCCATGGCTCCTGCAGCCAGGAACAGGTGGTGGCG     |
| <b>AbHex1-DsRedFor</b>         | CGCCACCACCTGTTCTGGCTGCAGGAGCCATGGGATATTACGACAACGAG      |
| <b>AbHex1Rev</b>               | CGAACGTTTGTACAATCACCTG                                  |
| <b>DsRedPTS1For</b>            | ACCTTGGAATGCATGGAGGA                                    |
| <b>DsRedPTS1Rev</b>            | GAATTCGATATCAAGCTTCTACAGCTTCGACAGGAACAGGTGGTGGCG        |
| <b>DsRedPTS1NATFor</b>         | CGCCACCACCTGTTCTGTGCGAAGCTGTAGAAGCTTGATATCGAATTC        |
| <b>DsRedPTS1NATRev</b>         | TCATTCTAGCTTGCGGTCCT                                    |
| <b>pex14KOFor</b>              | CAGCCTACCTCACCTCCAC                                     |
| <b>pex14KORev</b>              | GGTCTCACATGTCTCCGCTCTTGTGTCTCGCCTCTTCT                  |
| <b>pex14HygFor</b>             | AGAAGAGGCGAGGACAACAAGAGCGGAGACATGTGAGACC                |
| <b>pex14HygRev</b>             | TCATTCTAGCTTGCGGTCCT                                    |
| <b>PromoYap1For</b>            | GCTAGGTTGCCGCATTGGAC                                    |
| <b>PromoYap1Rev</b>            | TCCTCGCCCTTGCTCACCATTGCAAGTGCGCTTGCGGGG                 |
| <b>GFPYap1For</b>              | CCCCGCAAGCGCACTTGCAATGGTGAGCAAGGGCGAGGA                 |
| <b>GFPYap1Rev</b>              | AAGTCGTTAGTAGTTCCTGCCATGGCTCCTGCAGCCTTGTACAGCTCGTCCATGC |
| <b>Yap1For</b>                 | GCATGGACGAGCTGTACAAGGCTGCAGGAGCCATGGCAGGAACACTAACGACTT  |
| <b>Yap1Rev</b>                 | GACCGCAAGCTAGAATGATTACCCAAGCAGTTTGTCTT                  |
| <b>Yap1NATFor</b>              | AGGACAAACTGCTTGGGTAATCATTCTAGCTTGCGGTC                  |
| <b>Yap1NATRev</b>              | CTGCAGGCCGCTCAGGGGCAGG                                  |
| <b>TxAFor</b>                  | AGGAGTTCTGTACGCGCAAT                                    |
| <b>ToxA<sub>Y</sub>Yap1Rev</b> | AAGTCGTTAGTAGTTCCTGCCATGGCCTATATTCATTTCATTGTCAGC        |
| <b>Yap1overFor</b>             | GCTGACAATGAATGAATATAGGCCATGGCAGGAACACTAACGACTT          |
| <b>ATM1-expFor</b>             | TCTGAAGTAACACCAGGCAAGGGT                                |
| <b>ATM1-expRev</b>             | TCCATATATGTGTCGGCGCGGTAT                                |
| <b>YAP1- expFor</b>            | TCTGAAGTAACACCAGGCAAGGGT                                |
| <b>YAP1- expRev</b>            | TCCATATATGTGTCGGCGCGGTAT                                |
| <b>SKN7-expFor</b>             | ACATCATCATGCCGAACCTTGACG                                |
| <b>SKN7-expRev</b>             | ATGGAGATGTCGTCGCTTCGGATA                                |
| <b>CTT1- expFor</b>            | TCTGAAGTAACACCAGGCAAGGGT                                |

|                                             |                                     |
|---------------------------------------------|-------------------------------------|
| <b>CTT1- expRev</b>                         | TCCATATATGTGTCGGCGCGGTAT            |
| <b>SOD1- expFor</b>                         | TCTGAAGTAACACCAGGCAAGGGT            |
| <b>SOD1- expRev</b>                         | TCCATATATGTGTCGGCGCGGTAT            |
| <b>GSH1- expFor</b>                         | TCTGAAGTAACACCAGGCAAGGGT            |
| <b>GSH1- expRev</b>                         | TCCATATATGTGTCGGCGCGGTAT            |
| <b>GSH2- expFor</b>                         | TCTGAAGTAACACCAGGCAAGGGT            |
| <b>GSH2- expRev</b>                         | TCCATATATGTGTCGGCGCGGTAT            |
| <b>TRX2- expFor</b>                         | TCTGAAGTAACACCAGGCAAGGGT            |
| <b>TRX2- expRev</b>                         | TCCATATATGTGTCGGCGCGGTAT            |
| <b>GPX1- expFor</b>                         | TCTGAAGTAACACCAGGCAAGGGT            |
| <b>GPX1- expRev</b>                         | TCCATATATGTGTCGGCGCGGTAT            |
| <b>AbGAPDH-For</b>                          | TGGAAAGAACCTCGATGTCGGACT            |
| <b>AbGAPDH-Rev</b>                          | ACGTTGTTGAGTCCACTGGTGTCT            |
| <b>A1fn_ExpKpnFor</b>                       | TGGTACCGTCCCTGTTCGGCCCCGAG          |
| <b>A1fn_ExpHndRev</b>                       | TAAGCTTTCTGGCTGCCCTATCATGTTTCA      |
| <b><i>Aspergillus fumigatus</i> Primers</b> |                                     |
| <b>RAC21</b>                                | TGGCGACCACACCCGTCCTGTG              |
| <b>RAC22</b>                                | TAGGGTACCTGTCCGCGCGGGG              |
| <b>RAC39</b>                                | CCGTCGACTAAGCACGAGCACGAATCAC        |
| <b>RAC41</b>                                | ATTCTAGAAATGATCGGCTTCGCATATC        |
| <b>RAC109</b>                               | ACTCAGCTACATGCTGCCTACGTT            |
| <b>RAC110</b>                               | AGCTGATTACGAAAGCTCTCGCCT            |
| <b>RAC325</b>                               | ATCCTTGAAGCTGTCCCTGATGGT            |
| <b>RAC326</b>                               | TCCGGCTCGTATGTTGTGTGGAAT            |
| <b>RAC351</b>                               | ATGGGTGAGCATTGGAGGACTGAA            |
| <b>RAC352</b>                               | ACCTGATCATCATTGCGTCCCAGA            |
| <b>RAC357</b>                               | TTGCGGCCGCAACTCAGCTACATGCTGCCTACGTT |
